# Supplementary figures and images for: The Impact of Weight Loss Prior to Hospital Readmission
Source: MDPI journal article supplement (doi:10.3390/jcm12093074), 2023-04-24

Figure S1. Histograms – Test for normal distributions

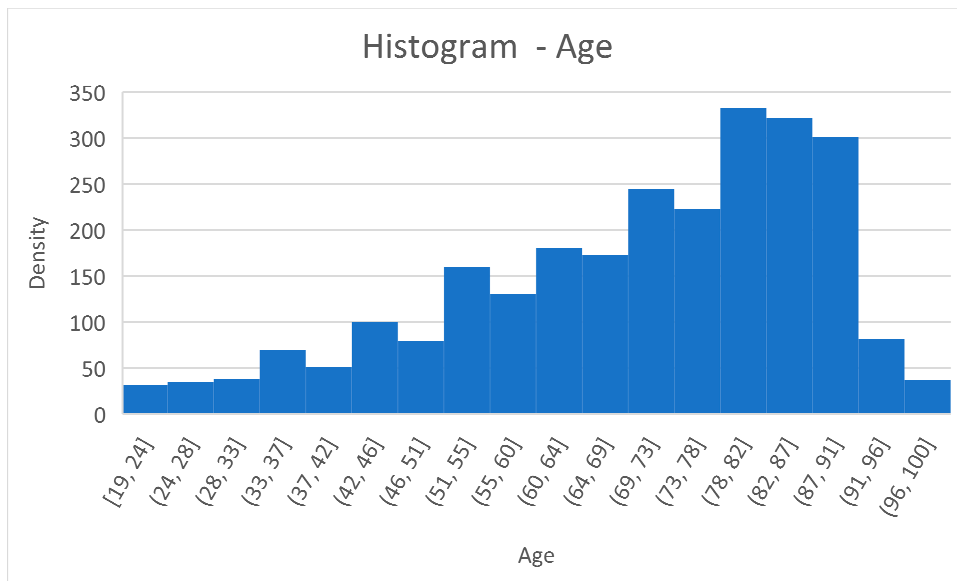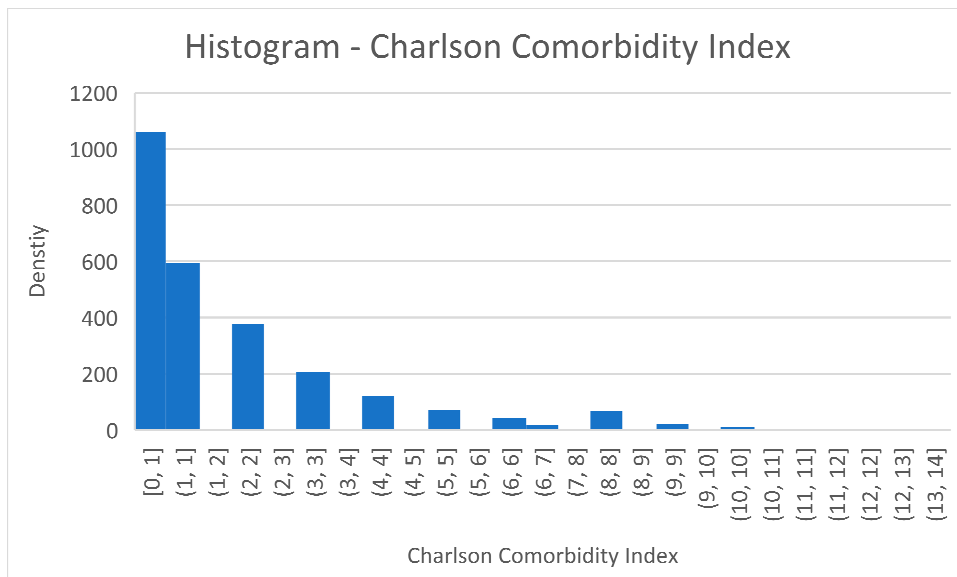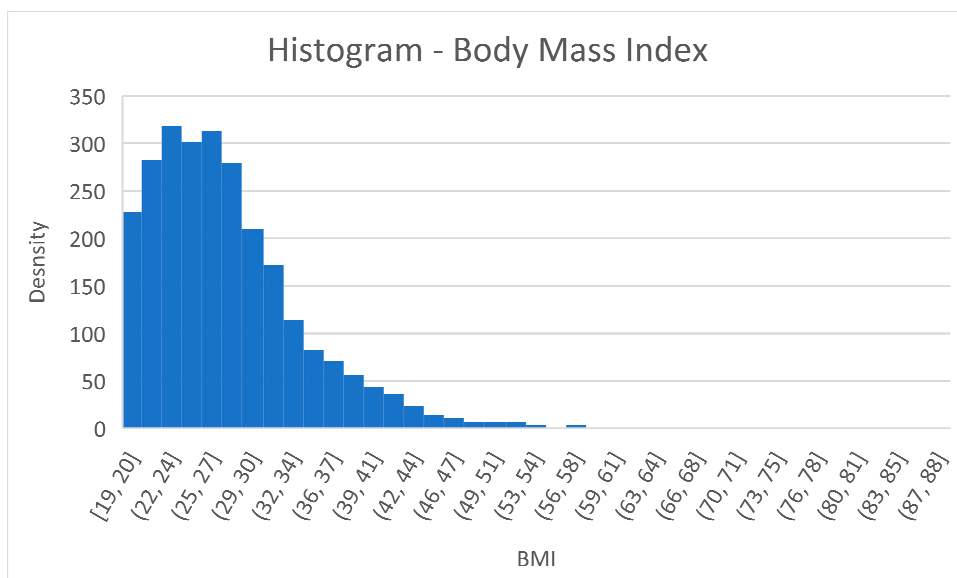

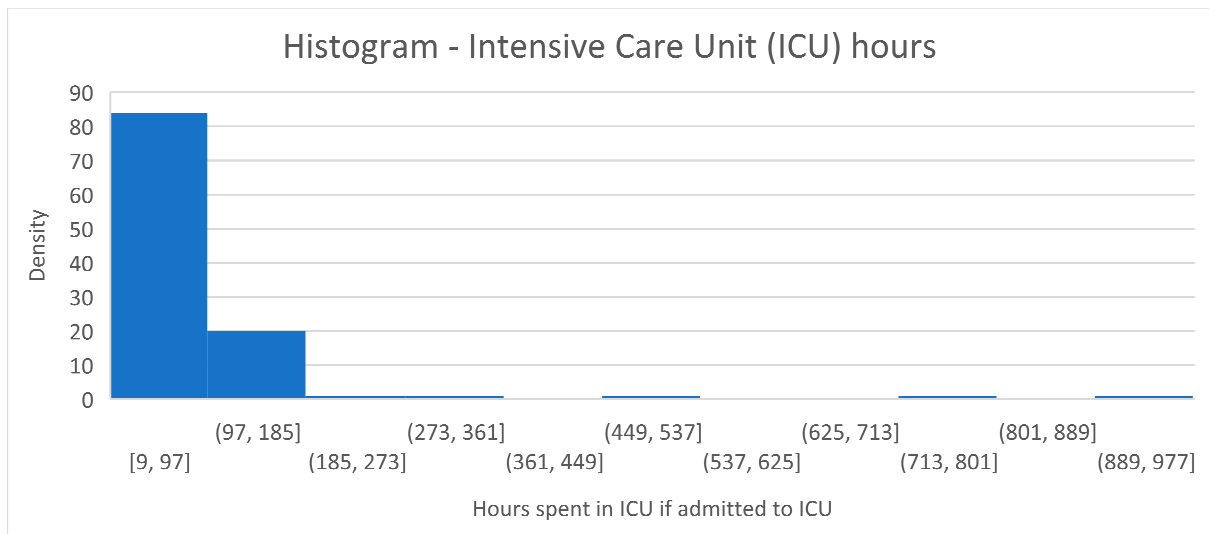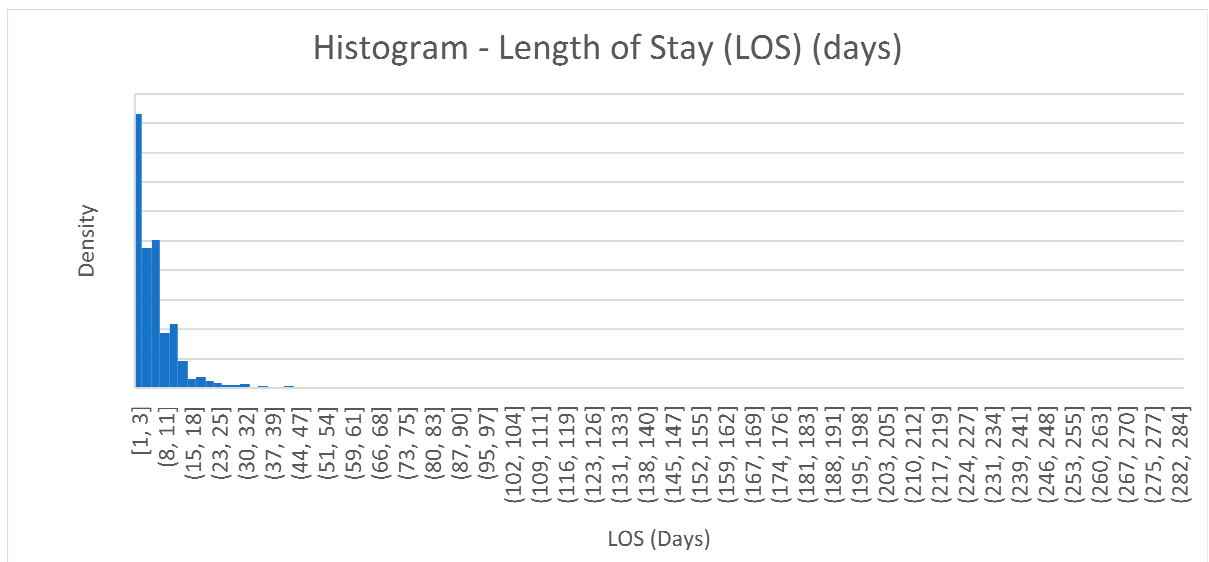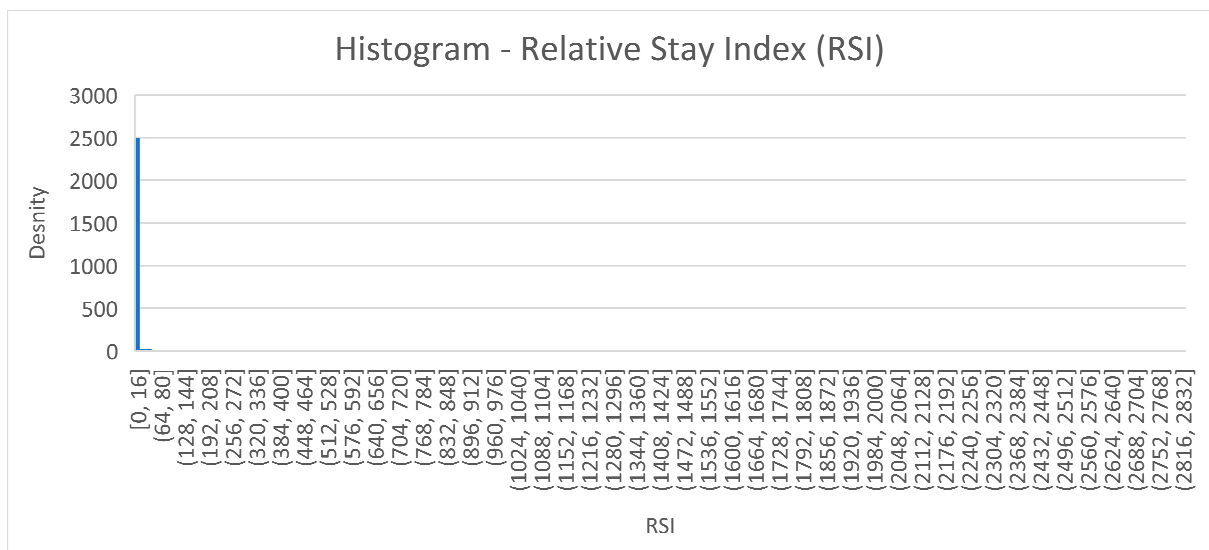

Supplement: s1 [file s1]
